# Supplementary material for: Combined experimental and theoretical studies of conformationally diverse (thio)semicarbazone-based semiconducting materials
Source: Royal Society of Chemistry journal article supplement (doi:10.1039/d3ce00137g), 2023-01-01
Supplement: d3ce00137g1.pdf [file d3ce00137g1.pdf]

## Supplementary Information

### Combined experimental and theoretical studies on a conformationally diverse (thio)semicarbazone based semiconducting materials

Anangamohan Panja,<sup>\*,a,b</sup> Mainak Das,<sup>c</sup> Narayan Ch. Jana,<sup>b</sup> Paula Brandão,<sup>d</sup> Rosa M. Gomila,<sup>e</sup> Joaquín Ortega-Castro,<sup>c</sup> Antonio Frontera<sup>\*,c</sup> and Partha Pratim Ray<sup>\*,c</sup>

<sup>a</sup> Department of Chemistry, Gokhale Memorial Girls' College, 1/1 Harish Mukherjee Road, Kolkata-700020, India. E-mail: ampanja@yahoo.co.in

<sup>b</sup> Department of Chemistry, Panskura Banamali College, Panskura RS, WB 721152, India

<sup>c</sup> Department of Physics, Jadavpur University, Raja S. C. Mallick Road, Jadavpur, Kolkata 700 032, India. E-mail: parthapray@yahoo.com

<sup>d</sup> Department of Chemistry, CICECO-Aveiro Institute of Materials, University of Aveiro, 3810-193 Aveiro, Portugal

<sup>e</sup> Department of Chemistry, Universitat de les Illes Balears, Crta. de Valldemossa km 7.5, 07122 Palma de Mallorca (Balears), SPAIN. E-mail: toni.frontera@uib.es

## Contents

|                                                                                                                                                                            |    |
|----------------------------------------------------------------------------------------------------------------------------------------------------------------------------|----|
| <b>Device Fabrication and Characterization:</b> .....                                                                                                                      | 3  |
| <b>Electrical Characterization:</b> .....                                                                                                                                  | 3  |
| <b>Table S1:</b> Crystallographic bond distances in ligands <b>1</b> and <b>2</b> . .....                                                                                  | 4  |
| <b>Table S2.</b> Hydrogen bonds for complex <b>1</b> [Å and °].....                                                                                                        | 4  |
| <b>Table S3.</b> Hydrogen bonds for complex <b>2</b> [Å and °].....                                                                                                        | 5  |
| <b>Fig. S1.</b> IR spectra of Schiff base ligand <b>1</b> and <b>2</b> .....                                                                                               | 5  |
| <b>Fig. S2:</b> <sup>1</sup> H NMR of ( <i>E</i> )-2-(2-hydroxy-3-methoxy-5-methylbenzylidene)hydrazine-1-carboxamide ( <b>1</b> ) in DMSO-d <sub>6</sub> at r.t. ....     | 6  |
| <b>Fig. S3:</b> <sup>13</sup> C NMR of ( <i>E</i> )-2-(2-hydroxy-3-methoxy-5-methylbenzylidene)hydrazine-1-carboxamide ( <b>1</b> ) in DMSO-d <sub>6</sub> at r.t. ....    | 6  |
| <b>Fig. S4:</b> <sup>1</sup> H NMR of ( <i>E</i> )-2-(2-hydroxy-3-methoxy-5-methylbenzylidene)hydrazine-1-carbothioamide ( <b>2</b> ) in DMSO-d <sub>6</sub> at r.t. ....  | 7  |
| <b>Fig. S5:</b> <sup>13</sup> C NMR of ( <i>E</i> )-2-(2-hydroxy-3-methoxy-5-methylbenzylidene)hydrazine-1-carbothioamide ( <b>2</b> ) in DMSO-d <sub>6</sub> at r.t. .... | 7  |
| <b>Fig. S6:</b> Crystal packing of <b>1</b> focusing on various hydrogen bonding's and the π··π stacking interaction. ....                                                 | 8  |
| <b>Fig. S7:</b> Crystal packing of <b>2</b> focusing on various hydrogen bonding's and the π··π stacking interaction. ....                                                 | 9  |
| <b>Solid State Calculation</b> .....                                                                                                                                       | 9  |
| <b>Fig. S8.</b> Electronic band structures of the ground state for the crystals structure.....                                                                             | 9  |
| <b>Fig. S9.</b> Calculated total and partial density of states of the crystal cells.....                                                                                   | 10 |
| <b>Fig. S10.</b> Representation of Homo-Lumo Orbitals of both crystals. The orbitals are represented using the 0.025 a.u. isovalue.....                                    | 11 |
| <b>References</b> .....                                                                                                                                                    | 12 |

### Device Fabrication and Characterization:

To fabricate the Schottky device, at first, Indium Tin Oxide (ITO) coated glass substrate was cleaned by acetone, distilled water and isopropanol repeatedly and sequentially in ultrasonication bath for 30 min. At the same time a well dispersed solution of the 1 and 2 in N N-dimethyl formamide (DMF) medium was prepared and spin coated onto the pre-cleaned ITO coated glass at 600 rpm for 1 min with the help of SCU 2700 spin coating unit. This spin coating step was repeated for 3 times. After drying in vacuum, the film thickness was measured as 1  $\mu\text{m}$  by surface profiler. Aluminum (Al) electrodes were deposited onto the film by a Vacuum Coating Unit 12A4D of HINDHIVAC under a pressure of  $10^{-6}$  Torr. The area of the Al electrodes was maintained as  $7.065 \times 10^{-6}$   $\text{m}^2$  by the shadow mask. The current-voltage measurements of the fabricated device with 1 and 2 were carried out by a Keithley 2635B source meter interfaced with PC by two-probe technique under dark and illumination in the voltage range -1V to +1V at room temperature.

### Electrical Characterization:

The Thermionic Emission (TE) theory is adopted to get more insights of the charge transport mechanism in the devices.<sup>S1</sup> The current of a diode can be expressed as the following equations according to TE theory.<sup>S2</sup>

$$I = I_0 \exp\left(\frac{qV}{\eta kT}\right) \left[1 - \exp\left(-\frac{qV}{\eta kT}\right)\right] \dots\dots(S1)$$

Where,

$$I_0 = AA^* T^2 \exp\left(-\frac{q\phi_B}{kT}\right) \dots\dots(S2)$$

$$\phi_B = \frac{kT}{q} \ln\left(\frac{AA^* T^2}{I_0}\right) \dots\dots(S3)$$

Where,  $I_0$  indicates the saturation current,  $q$  represents the electronic charge,  $k$  is the Boltzmann constant,  $T$  is the temperature in Kelvin,  $V$  is the forward bias voltage,  $\eta$  is the ideality factor,  $\phi_B$  is the effective barrier height at zero bias,  $A$  is the diode area ( $7.065 \times 10^{-6}$   $\text{m}^2$ ),  $A^*$  is the effective Richardson constant ( $1.20 \times 10^6$   $\text{Am}^{-2}\text{K}^{-2}$ ). From Cheung, the forward bias I-V characteristics in term of series resistance can be expressed as.<sup>S3</sup>

$$I = I_0 \exp\left[\frac{q(V - IR_S)}{\eta kT}\right] \dots\dots(S4)$$

Where, the  $IR_S$  term represents the voltage drop across series resistance of device. In this circumstance, the values of the series resistance can be determined from following functions using equation (S5 & S6).<sup>S4</sup>

According to Cheung's model:

$$\frac{dV}{d\ln(I)} = \left( \frac{\eta kT}{q} \right) + R_S I \quad \dots\dots\dots(S5)$$

$$H(I) = R_S I + \eta \phi_B \quad \dots\dots\dots(S6)$$

and H(J) can be expressed as:

$$H(I) = V - \left( \frac{\eta kT}{q} \right) \ln \left( \frac{I}{AA * T^2} \right) \quad \dots\dots\dots(S7)$$

**Table S1:** Crystallographic bond distances in ligands **1** and **2**.

| Bonds     | <b>1</b>   | Bonds       | <b>2</b>   |
|-----------|------------|-------------|------------|
| O(1)-C(1) | 1.3645(11) | S(1)-C(8)   | 1.6858(18) |
| O(3)-C(8) | 1.2428(12) | S(1A)-C(8A) | 1.6880(19) |
| N(1)-C(7) | 1.2898(12) | O(1A)-C(1A) | 1.3697(17) |
| N(1)-N(2) | 1.3739(11) | O(1)-C(1)   | 1.3608(17) |
| N(2)-C(8) | 1.3651(12) | N(1)-C(7)   | 1.2897(18) |
| N(3)-C(8) | 1.3376(13) | N(1)-N(2)   | 1.3717(17) |
| C(1)-C(6) | 1.3967(12) | N(2)-C(8)   | 1.3526(18) |
|           |            | N(2A)-C(8A) | 1.3481(17) |
|           |            | N(2A)-N(1A) | 1.3737(17) |
|           |            | N(1A)-C(7A) | 1.2784(17) |
|           |            | N(3)-C(8)   | 1.3252(17) |
|           |            | N(3A)-C(8A) | 1.3256(19) |

**Table S2.** Hydrogen bonds for complex **1** [ $\text{\AA}$  and  $^\circ$ ].

| D-H...A             | d(D-H)    | d(H...A)  | d(D...A)   | <(DHA)    |
|---------------------|-----------|-----------|------------|-----------|
| C(9)-H(9A)...O(3)#1 | 0.98      | 2.54      | 3.5136(15) | 173.2     |
| N(3)-H(3B)...O(1)#2 | 0.898(16) | 2.125(16) | 3.0172(11) | 172.2(14) |
| O(1)-H(1)...N(1)    | 0.874(19) | 1.872(18) | 2.6513(10) | 147.5(16) |
| N(2)-H(2)...O(3)#3  | 0.922(17) | 1.861(18) | 2.7805(11) | 175.4(15) |

Symmetry transformations used to generate equivalent atoms:

#1 x-1,y,z-1 #2 x+1/2,-y+1/2,z+1/2 #3 -x+1,-y+1,-z+2

**Table S3.** Hydrogen bonds for complex **2** [ $\text{\AA}$  and  $^\circ$ ].

| D-H...A               | d(D-H)  | d(H...A)  | d(D...A) | $\angle(\text{DHA})$ |
|-----------------------|---------|-----------|----------|----------------------|
| C(7)-H(7)...S(1)#1    | 0.95    | 2.95      | 3.797(3) | 148.8                |
| C(9A)-H(9AC)...O(1)#2 | 0.98    | 2.63      | 3.319(3) | 127.7                |
| O(1)-H(1)...N(1)      | 0.82(2) | 1.91(2)   | 2.629(2) | 147(2)               |
| O(1A)-H(1A)...S(1)#3  | 0.78(2) | 2.74(2)   | 3.298(3) | 130.2(19)            |
| O(1A)-H(1A)...O(2A)   | 0.78(2) | 2.09(2)   | 2.614(2) | 124(2)               |
| N(2A)-H(2A)...S(1A)#3 | 0.91(2) | 2.51(2)   | 3.408(3) | 172.2(17)            |
| N(2)-H(2)...S(1)#1    | 0.88(2) | 2.54(2)   | 3.419(3) | 172.4(17)            |
| N(3)-H(3B)...O(1A)#3  | 0.91(2) | 2.05(2)   | 2.909(3) | 155.5(17)            |
| N(3A)-H(3AB)...O(1)   | 0.83(2) | 2.08(2)   | 2.897(2) | 170.8(18)            |
| N(3A)-H(3AB)...O(2)   | 0.83(2) | 2.574(19) | 3.054(3) | 118.4(16)            |

Symmetry transformations used to generate equivalent atoms:

#1  $-x+1, -y+2, -z$  #2  $-x+1, -y, -z+1$  #3  $-x, -y+1, -z+1$

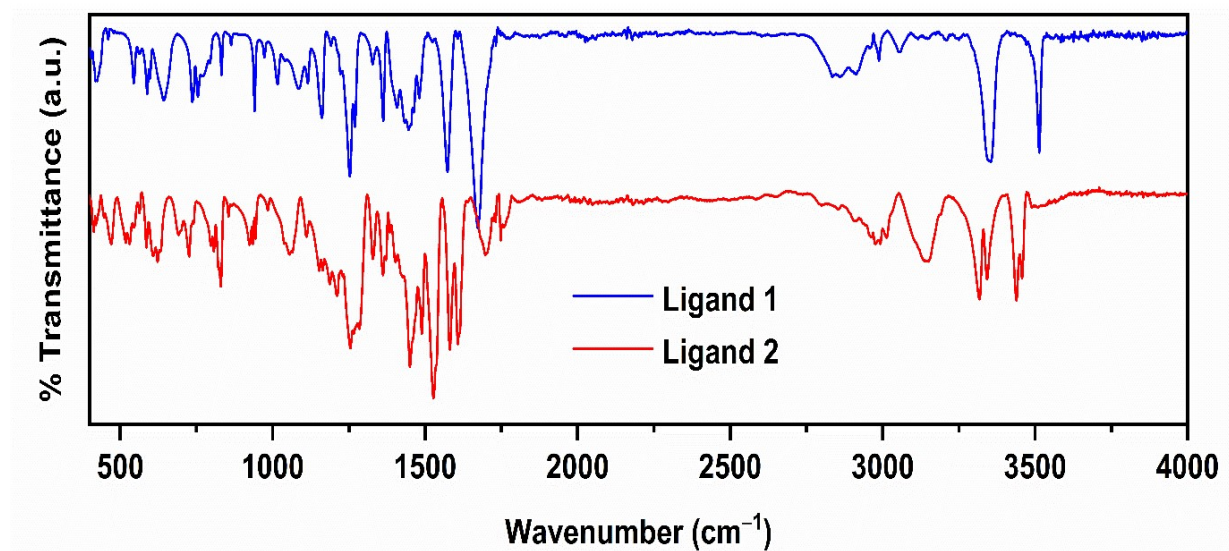

**Fig. S1.** IR spectra of Schiff base ligand 1 and 2.

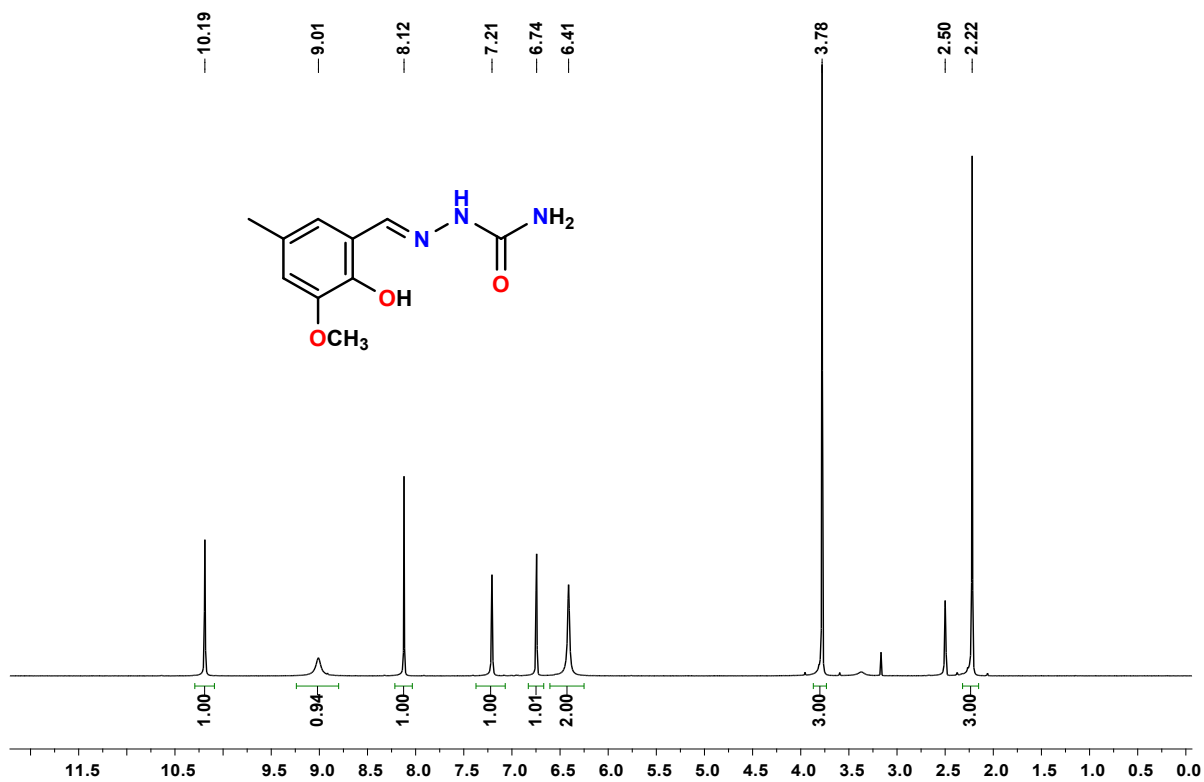

**Fig. S2:** <sup>1</sup>H NMR of *(E)*-2-(2-hydroxy-3-methoxy-5-methylbenzylidene)hydrazine-1-carboxamide (**1**) in DMSO-d<sub>6</sub> at r.t.

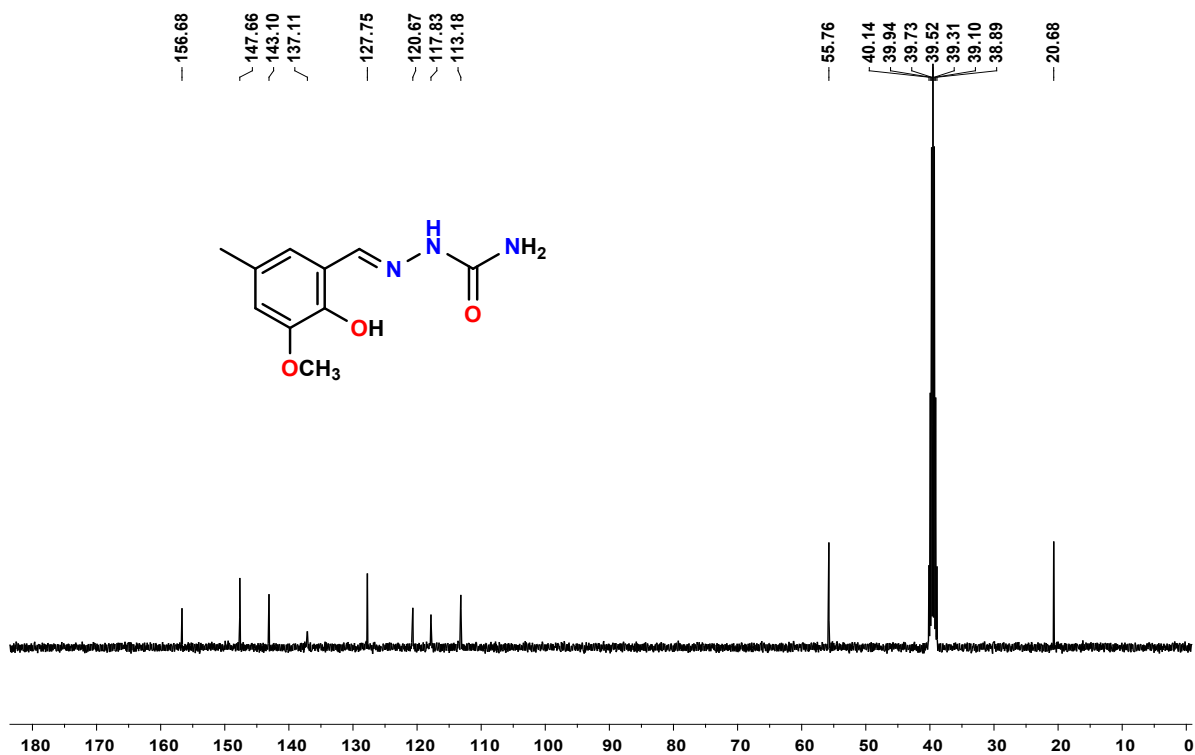

**Fig. S3:** <sup>13</sup>C NMR of *(E)*-2-(2-hydroxy-3-methoxy-5-methylbenzylidene)hydrazine-1-carboxamide (**1**) in DMSO-d<sub>6</sub> at r.t.

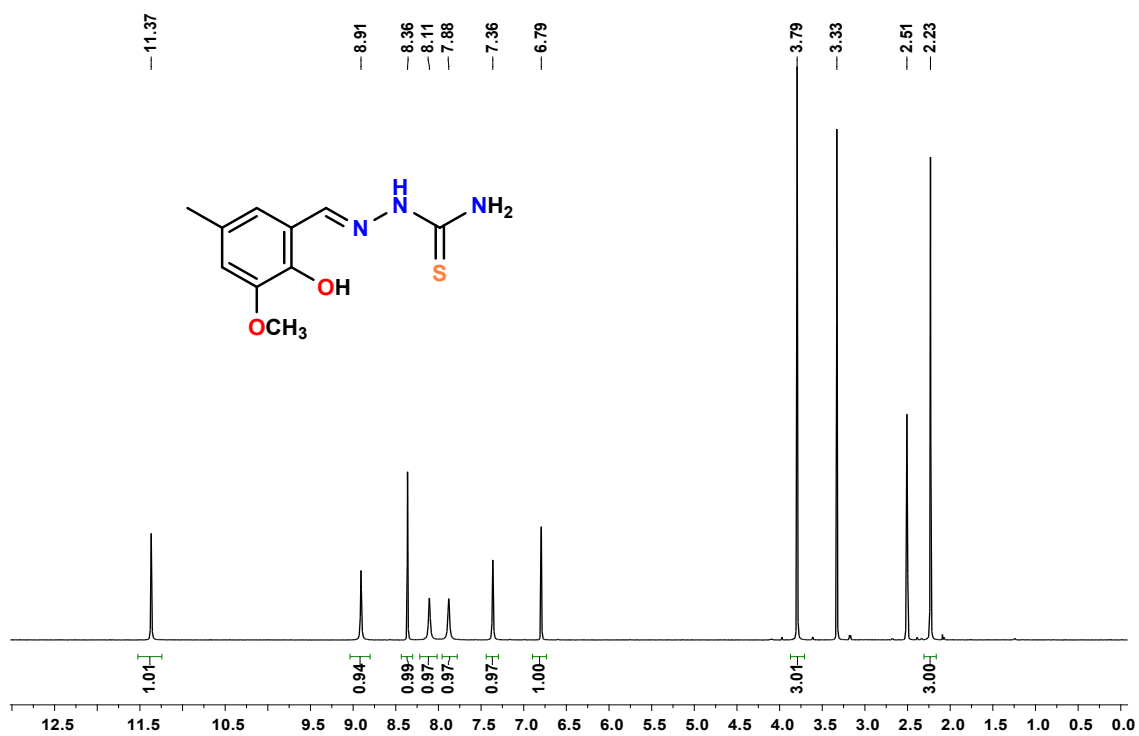

**Fig. S4:**  $^1\text{H}$  NMR of (E)-2-(2-hydroxy-3-methoxy-5-methylbenzylidene)hydrazine-1-carbothioamide (2) in  $\text{DMSO-d}_6$  at r.t.

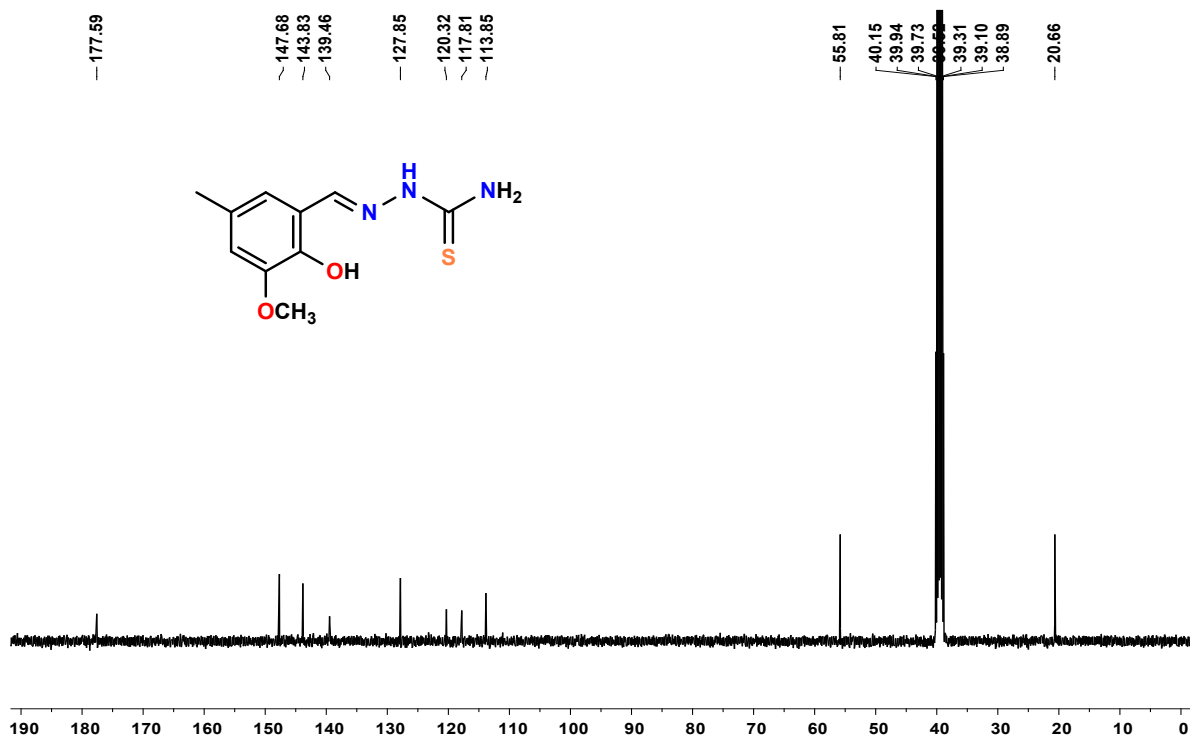

**Fig. S5:**  $^{13}\text{C}$  NMR of (E)-2-(2-hydroxy-3-methoxy-5-methylbenzylidene)hydrazine-1-carbothioamide (2) in  $\text{DMSO-d}_6$  at r.t.

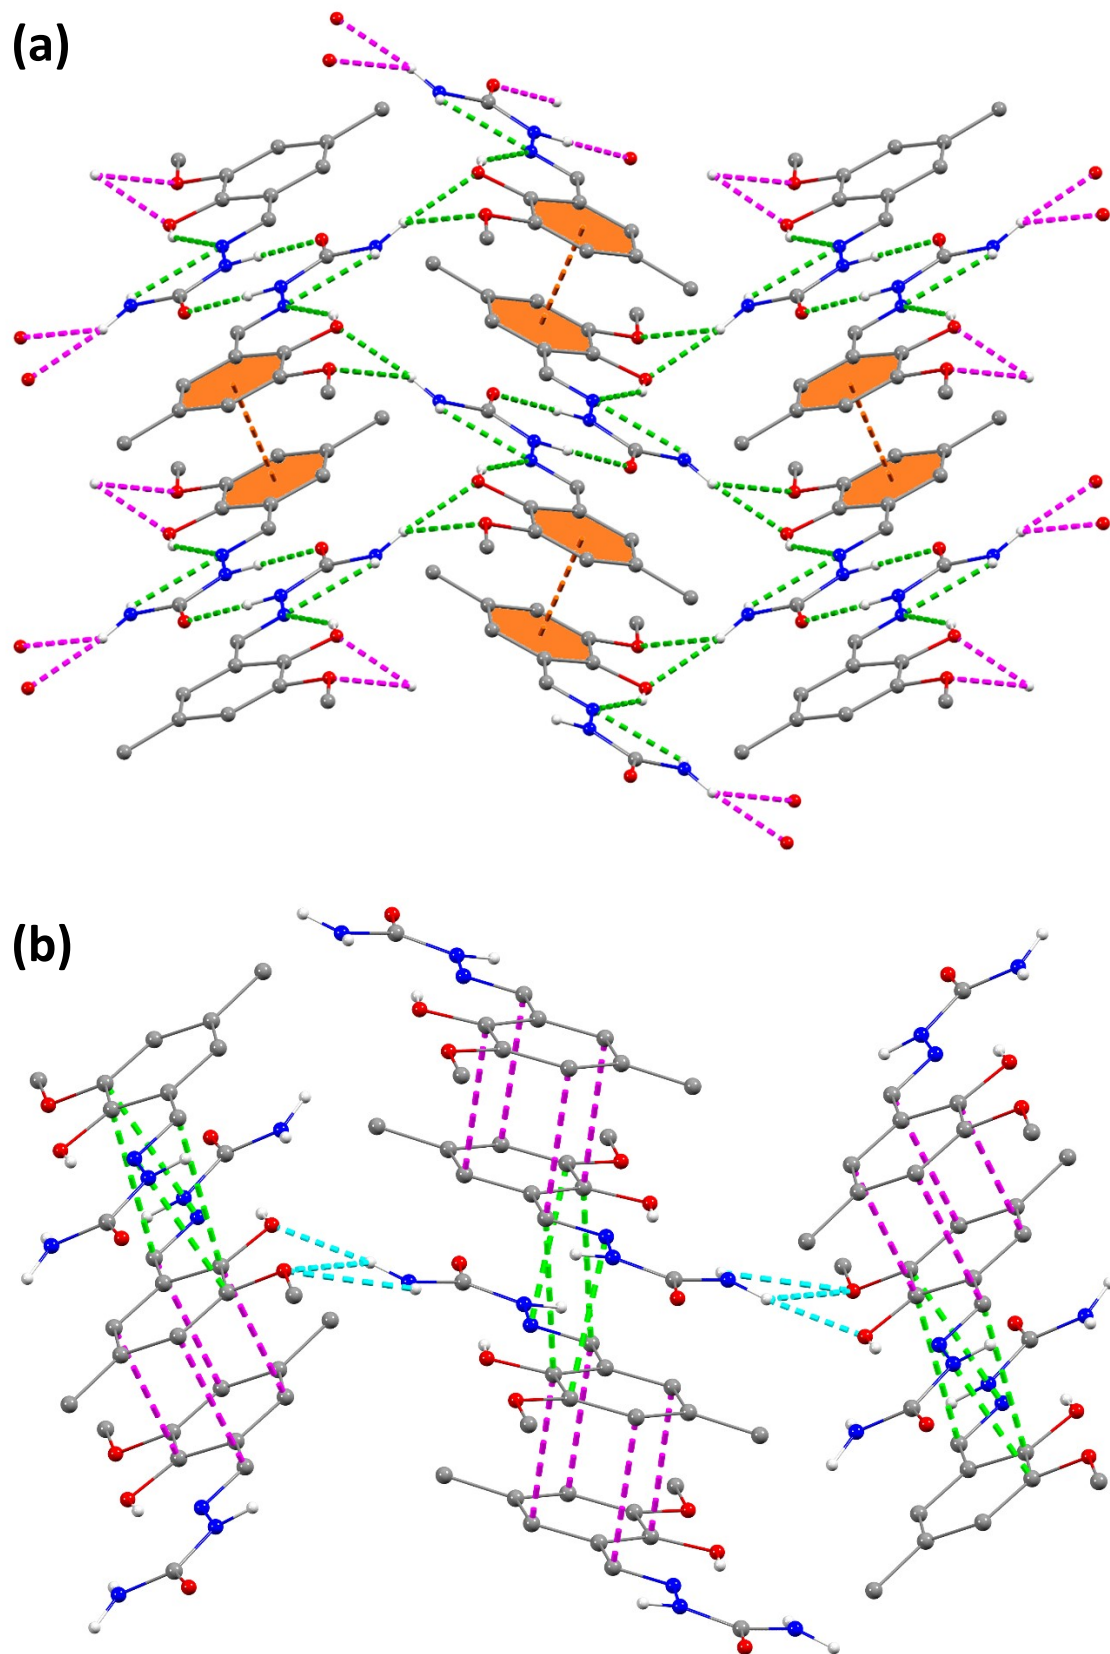

**Fig. S6:** Crystal packing of 1 focusing on various hydrogen bonding's and the  $\pi \cdots \pi$  stacking interaction.



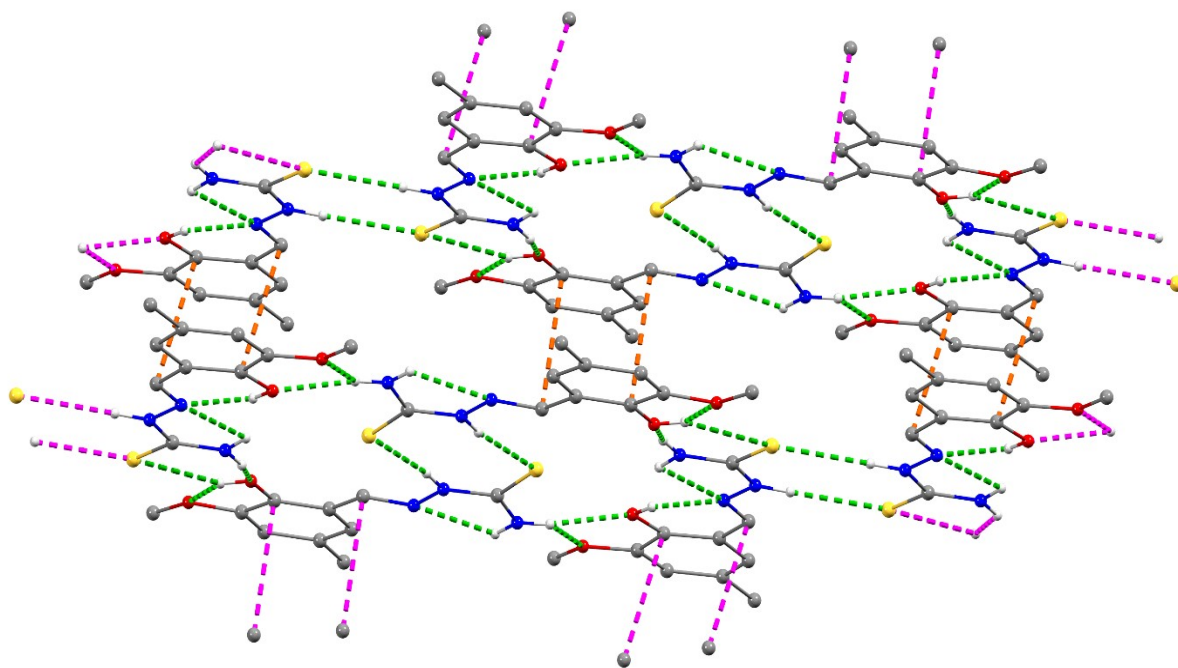

**Fig. S7:** Crystal packing of **2** focusing on various hydrogen bonding's and the  $\pi\cdots\pi$  stacking interaction.

**Solid State Calculation:**

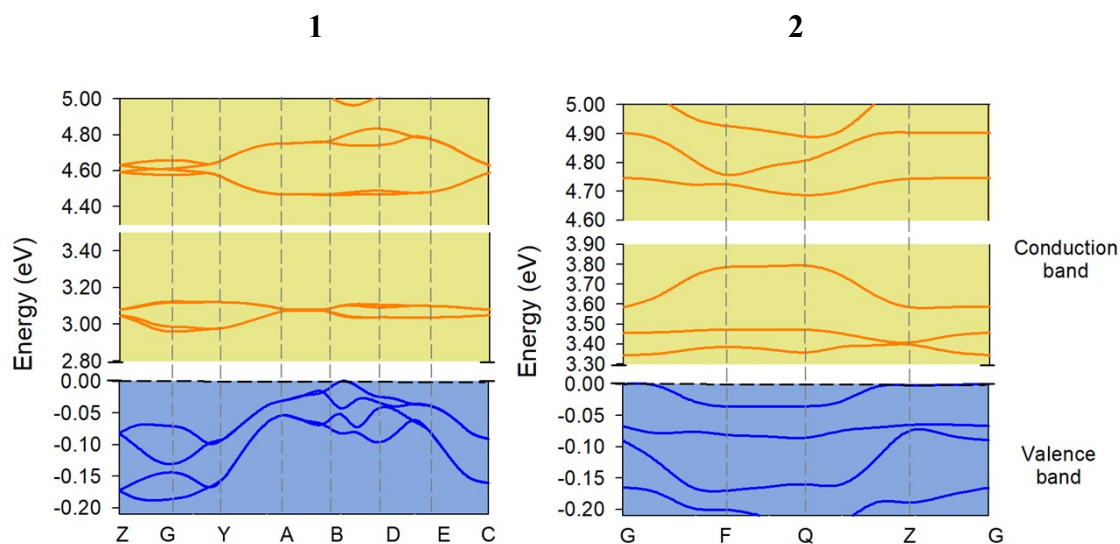

**Fig. S8.** Electronic band structures of the ground state for the crystals structure. Points of high symmetry in the first Brillouin zone are labeled as follows: Z = (0, 0, 0.5); G = (0, 0, 0); Y = (0, 0.5, 0); A = (-0.5, 0.5, 0); B = (-0.5, 0, 0); D = (-0.5, 0, 0.5); E = (-0.5, 0.5, 0.5); C = (0, 0.5, 0.5). F = (0, 0.5, 0); Q = (0, 0.5, 0.5); Z = (0, 0, 0.5). Scissor operator applied to compound **1** of 0.3 eV and compound **2** of 0.9 eV.

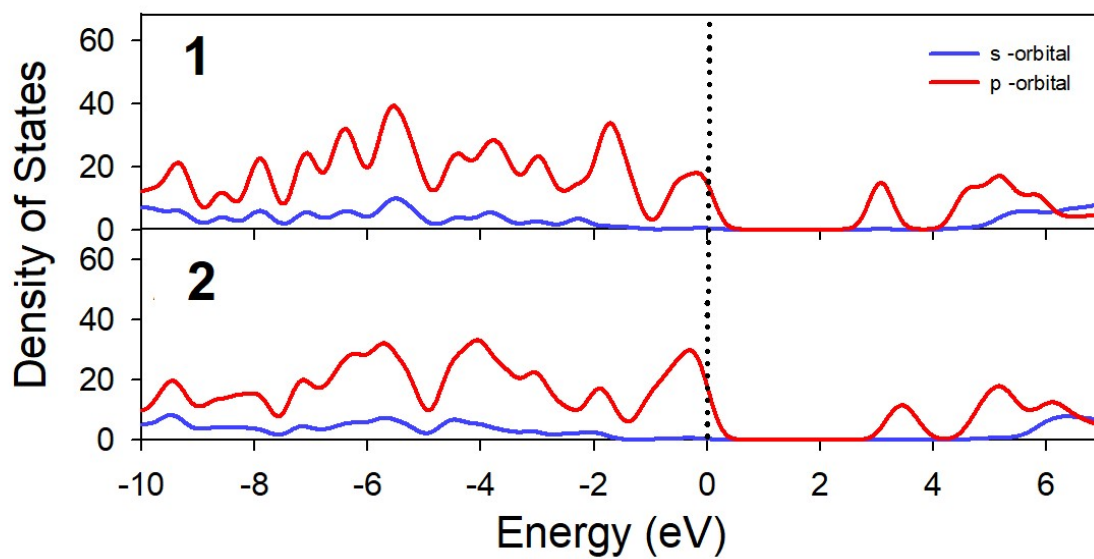

**Fig. S9.** Calculated total and partial density of states of the crystal cells. Panels show: 1) **1** crystal, B.) **2** crystal. The lines represent the s-orbital character (blue), p-orbital character (red) of the atoms into the crystal. Scissor operator applied to **1** of 0.3 eV and to **2** of 0.9 eV.

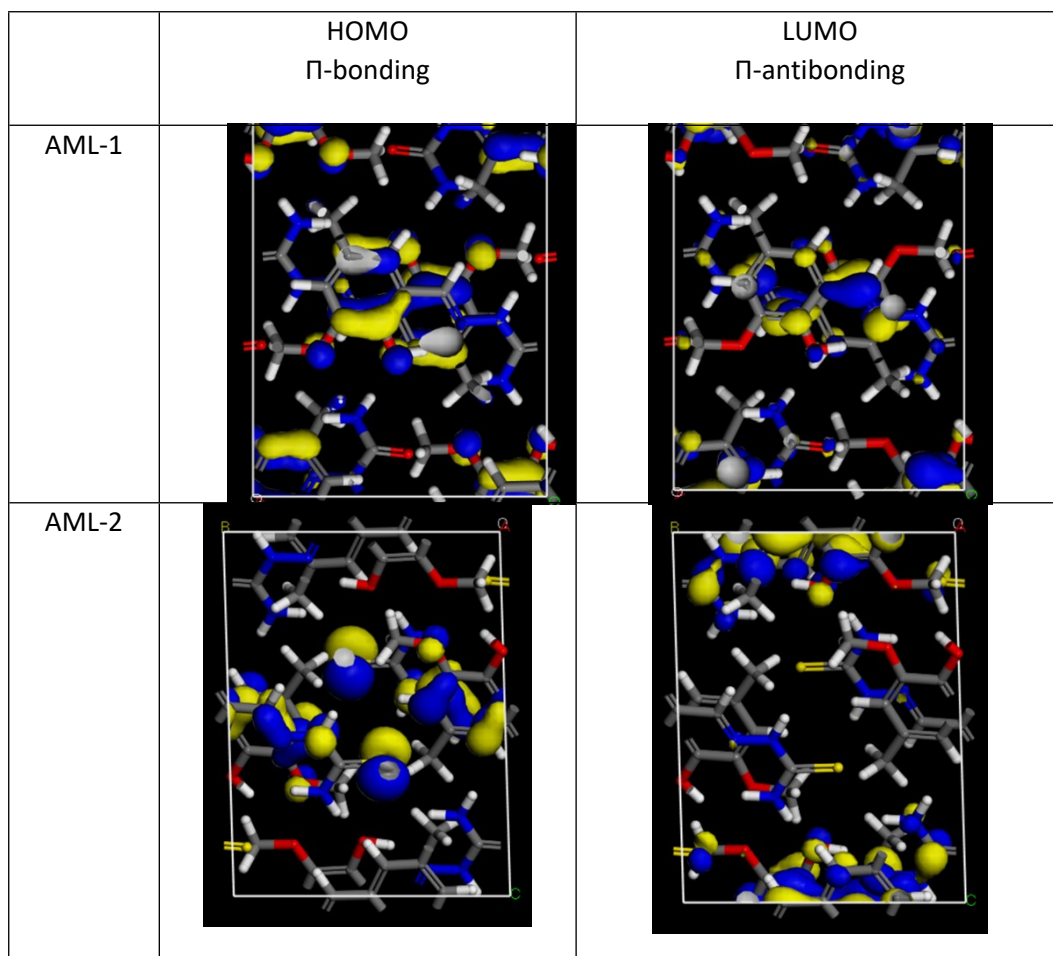

**Fig. S10.** Representation of Homo-Lumo Orbitals of both crystals. The orbitals are represented using the 0.025 a.u. isovalue.

## References

S1. E. H. Rhoderick and R. H. Williams, *Metal-Semiconductor Contacts*, Clarendon Press, Oxford, 2nd edn, 1988.

S2. S. M. Sze, *Physics of Semiconductor Devices*, Wiley, New York., 1981.

S3. S. Sil, R. Jana, A. Biswas, D. Das, A. Dey, J. Datta, D. Sanyal and P. P. Ray, *IEEE Trans. Electron Devices*, 2020, **67**, 2082–2087.

S4. S. Mahato, A. Mondal, M. Das, M. Joshi, P. P. Ray, A. R. Choudhury, C. M. Reddy, B. Biswas, *Dalton Trans.*, 2022, **51**, 1561–1570.
